# Supplementary material for: Notes on the distribution and habitat use of marmosets (Callitrichidae: Mico) from south-central Amazonia
Source: Copernicus journal article supplement (doi:10.5194/pb-10-7-2023), 2023-07-28
Supplement: Supplementary file [file pb-10-7-2023-supplement.pdf]

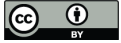

*Supplement of*

**Notes on the distribution and habitat use of marmosets  
(Callitrichidae: *Mico*) from south-central Amazonia**

**Rodrigo Costa-Araújo et al.**

*Correspondence to:* Rodrigo Costa Araújo ([rcostaaraujo@dpz.eu](mailto:rcostaaraujo@dpz.eu))

The copyright of individual parts of the supplement might differ from the article licence.

Supplementary material. Occurrence records of *Mico chrysoleucos*, *Mico acariensis* and *M. melanurus* on the Aripuanã–Sucundurí interfluve, south-central Amazonia, Amazonas State, Brazil. Bold=type locality.

| <b>Species</b>                  | <b>Latitude</b> | <b>Longitude</b> | <b>Municipality</b>  | <b>Type of record</b> | <b>Source</b>                  |
|---------------------------------|-----------------|------------------|----------------------|-----------------------|--------------------------------|
| <i><b>Mico acariensis</b></i>   | -5,118889       | -60,020556       | Novo Aripuanã        | inference             | Roosmalen et al., 2000         |
| <i>Mico acariensis</i>          | -6,900000       | -59,050000       | Apuí                 | observation           | Noronha et al., 2007           |
| <i>Mico acariensis</i>          | -7,283333       | -58,833333       | Apuí                 | observation           | Noronha et al., 2007           |
| <i>Mico acariensis</i>          | -6,798541       | -59,055512       | Apuí                 | observation           | this paper                     |
| <i>Mico acariensis</i>          | -6,814131       | -59,077342       | Apuí                 | observation           | this paper                     |
| <i>Mico acariensis</i>          | -7,085014       | -59,629900       | Apuí                 | observation           | this paper                     |
| <i><b>Mico chrysoleucos</b></i> | -4,400000       | -59,583333       | Borba                | observation           | Wagner, 1842                   |
| <i>Mico chrysoleucos</i>        | -3,300000       | -58,250000       | Itacoatiara          | observation           | Hershkovitz, 1977              |
| <i>Mico chrysoleucos</i>        | -3,366666       | -58,750000       | Itacoatiara          | observation           | Hershkovitz, 1977              |
| <i>Mico chrysoleucos</i>        | -3,383000       | -58,260000       | Itacoatiara          | observation           | Hershkovitz, 1977              |
| <i>Mico chrysoleucos</i>        | -4,360000       | -59,716000       | Borba                | observation           | Hershkovitz, 1977              |
| <i>Mico chrysoleucos</i>        | -7,260000       | -60,380000       | Apuí                 | observation           | Hershkovitz, 1977              |
| <i>Mico chrysoleucos</i>        | -4,016414       | -59,100000       | Borba                | observation           | Silva-Júnior and Noronha, 2000 |
| <i>Mico chrysoleucos</i>        | -3,350556       | -58,296678       | Itacoatiara          | observation           | Silva et al., 2018             |
| <i>Mico chrysoleucos</i>        | -3,390856       | -57,987231       | Maués                | observation           | Silva et al., 2018             |
| <i>Mico chrysoleucos</i>        | -3,790836       | -59,041389       | Nova Olinda do Norte | observation           | Silva et al., 2018             |
| <i>Mico chrysoleucos</i>        | -4,368075       | -59,710858       | Borba                | observation           | Silva et al., 2018             |
| <i>Mico chrysoleucos</i>        | -4,387525       | -59,593636       | Borba                | observation           | Silva et al., 2018             |
| <i>Mico chrysoleucos</i>        | -7,104853       | -60,001692       | Apuí                 | observation           | Silva et al., 2018             |
| <i>Mico chrysoleucos</i>        | -7,104853       | -60,645672       | Novo Aripuanã        | observation           | Silva et al., 2018             |
| <i>Mico chrysoleucos</i>        | -7,233897       | -60,007789       | Apuí                 | observation           | Silva et al., 2018             |

| <b>Species</b>           | <b>Latitude</b> | <b>Longitude</b> | <b>Municipality</b> | <b>Type of record</b> | <b>Source</b>        |
|--------------------------|-----------------|------------------|---------------------|-----------------------|----------------------|
| <i>Mico chrysoleucos</i> | -7,275289       | -60,453353       | Apuí                | observation           | Silva et al., 2018   |
| <i>Mico chrysoleucos</i> | -7,533814       | -60,667919       | Apuí                | observation           | Silva et al., 2018   |
| <i>Mico chrysoleucos</i> | -7,708381       | -60,582564       | Apuí                | observation           | Silva et al., 2018   |
| <i>Mico chrysoleucos</i> | -8,358336       | -59,864186       | Apuí                | observation           | Silva et al., 2018   |
| <i>Mico chrysoleucos</i> | -8,359453       | -59,853911       | Apuí                | observation           | Silva et al., 2018   |
| <i>Mico chrysoleucos</i> | -2,948525       | -58,060408       | Urucurituba         | observation           | this paper           |
| <i>Mico chrysoleucos</i> | -2,952100       | -58,068181       | Urucurituba         | observation           | this paper           |
| <i>Mico chrysoleucos</i> | -3,337431       | -57,886325       | Maués               | observation           | this paper           |
| <i>Mico chrysoleucos</i> | -5,225028       | -60,230722       | Novo Aripuanã       | observation           | this paper           |
| <i>Mico chrysoleucos</i> | -7,204571       | -60,018139       | Apuí                | vocalization          | this paper           |
| <i>Mico chrysoleucos</i> | -7,256651       | -60,061049       | Apuí                | observation           | this paper           |
| <i>Mico chrysoleucos</i> | -7,466389       | -60,521506       | Apuí                | observation           | this paper           |
| <i>Mico chrysoleucos</i> | -7,523015       | -60,652183       | Apuí                | observation           | this paper           |
| <i>Mico chrysoleucos</i> | -7,697614       | -60,619703       | Apuí                | observation           | this paper           |
| <i>Mico chrysoleucos</i> | -7,771944       | -60,381639       | Apuí                | vocalization          | this paper           |
| <i>Mico chrysoleucos</i> | -8,236039       | -60,034817       | Apuí                | observation           | this paper           |
| <i>Mico chrysoleucos</i> | -7,106933       | -59,691281       | Apuí                | vocalization          | this paper           |
| <i>Mico melanurus</i>    | -8,350000       | -58,616667       | Apuí                | observation           | Noronha et al., 2008 |
| <i>Mico melanurus</i>    | -8,566667       | -59,133333       | Apuí                | observation           | Noronha et al., 2008 |
